# Supplementary material for: Synthesis, Spectroscopic, and Thermal Investigations of Metal Complexes with Mefenamic Acid
Source: Hindawi journal article supplement (doi:10.1155/2017/6172626), 2017-01-01
Supplement: f1 [file 6172626.f1.docx]

**Supplementary Material**

**Synthesis, spectroscopic and thermal investigations of metal complexes with mefenamic acid**

Karolina Kafarska*, Michał Gacki, Wojciech Wolf,

*Corresponding author: [karolina.kafarska@p.lodz.pl](mailto:karolina.kafarska@p.lodz.pl)

Institute of General and Ecological Chemistry, Faculty of Chemistry, Lodz University of Technology, 116 Zeromskiego Street, 90-924 Lodz, Poland,


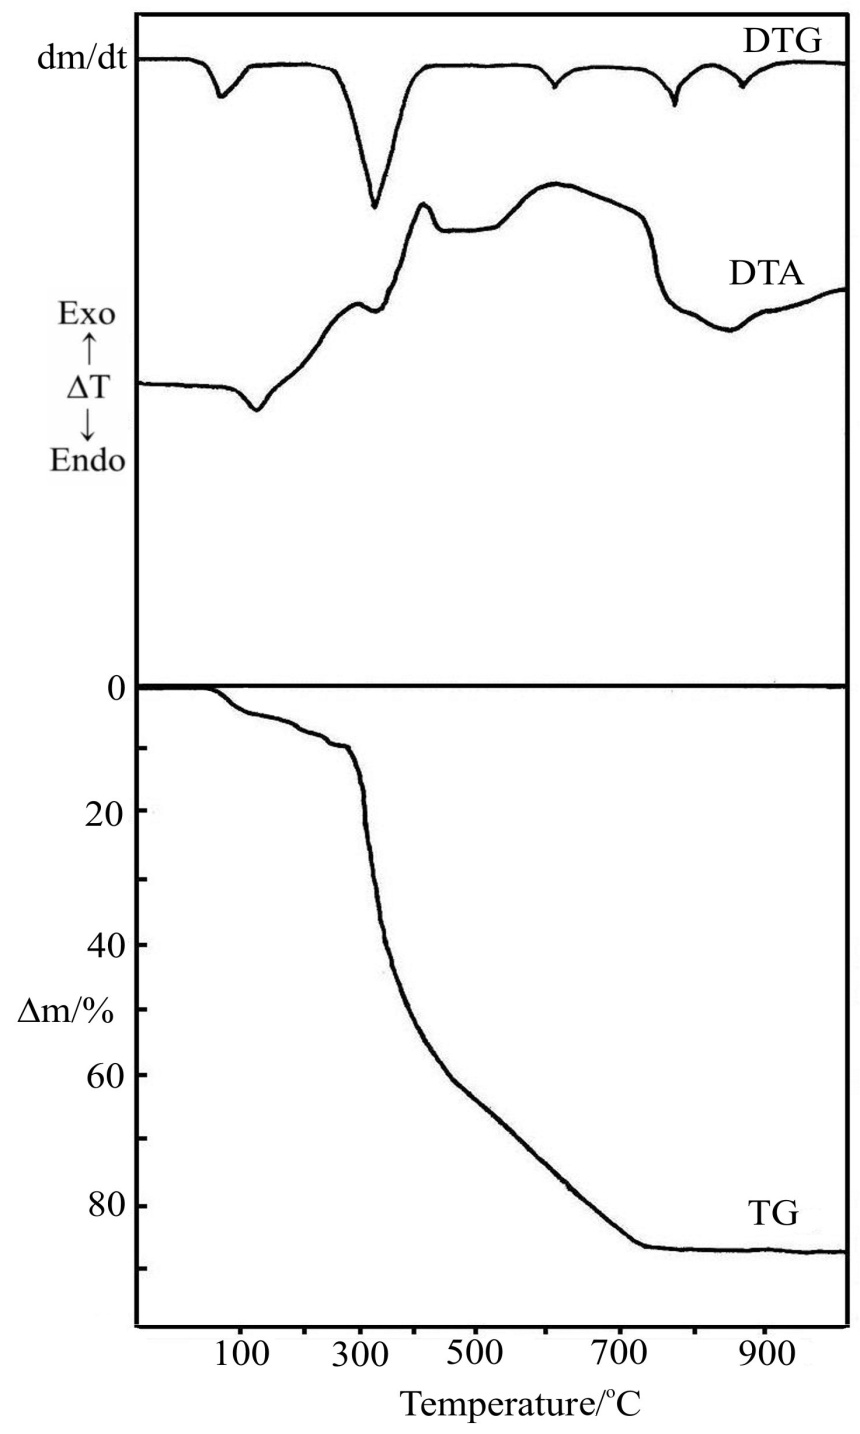


Figure 1A. TG/DTG/DTA curves of Mn(mef)2∙3H2O


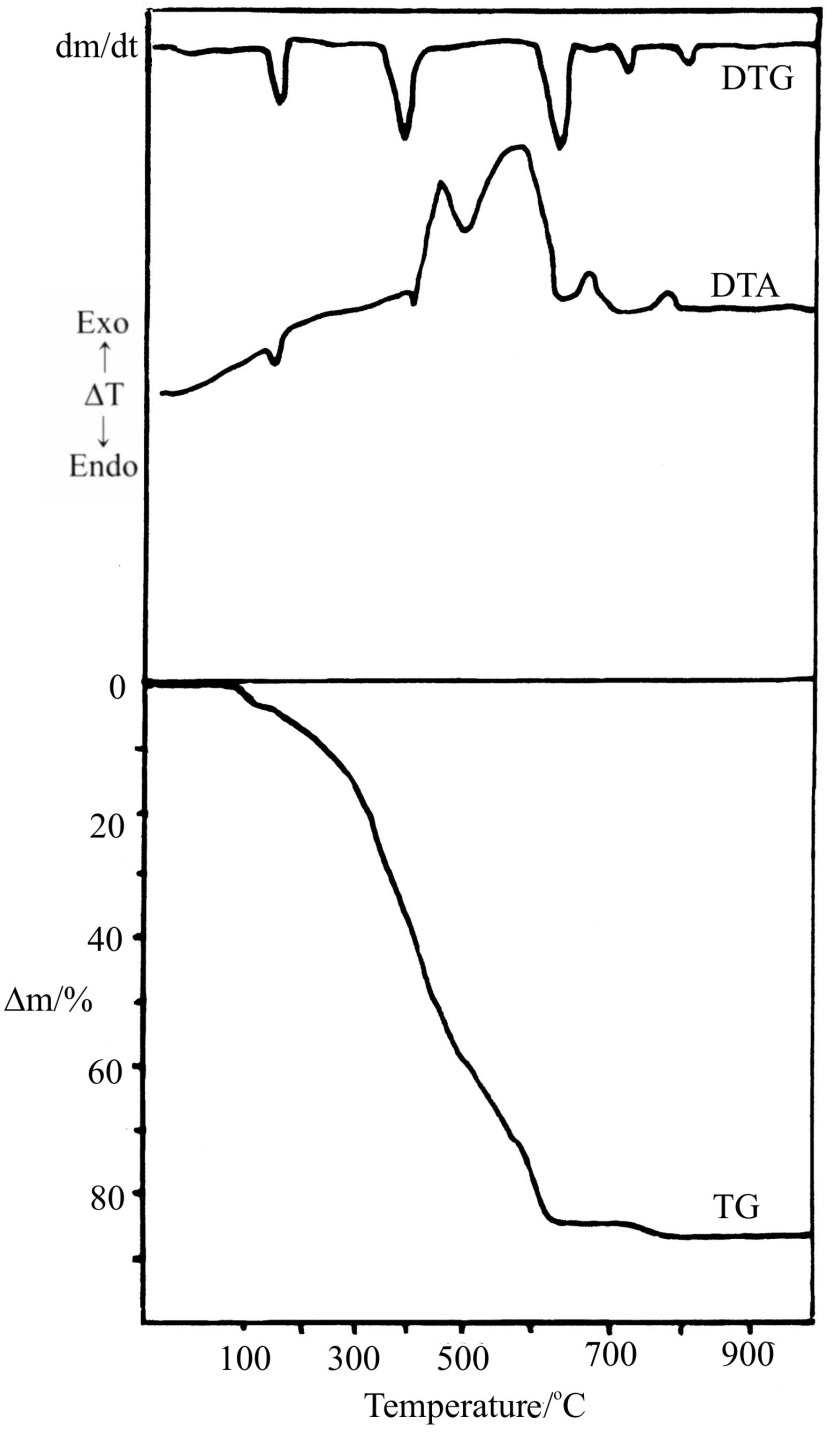


Figure 2A. TG/DTG/DTA curves of Co(mef)2∙2H2O


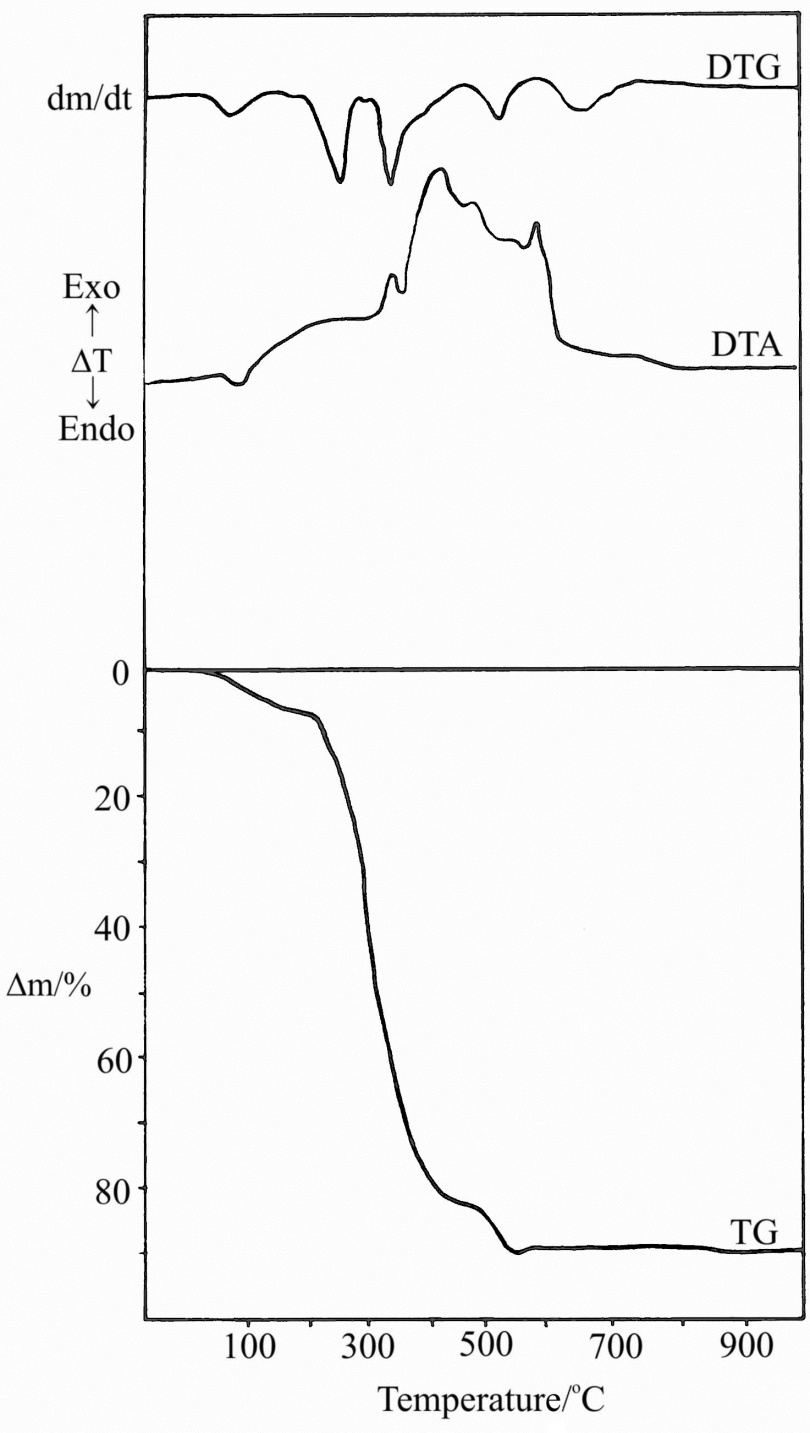


Figure 3A. TG/DTG/DTA curves of Ni(mef)2∙2H2O


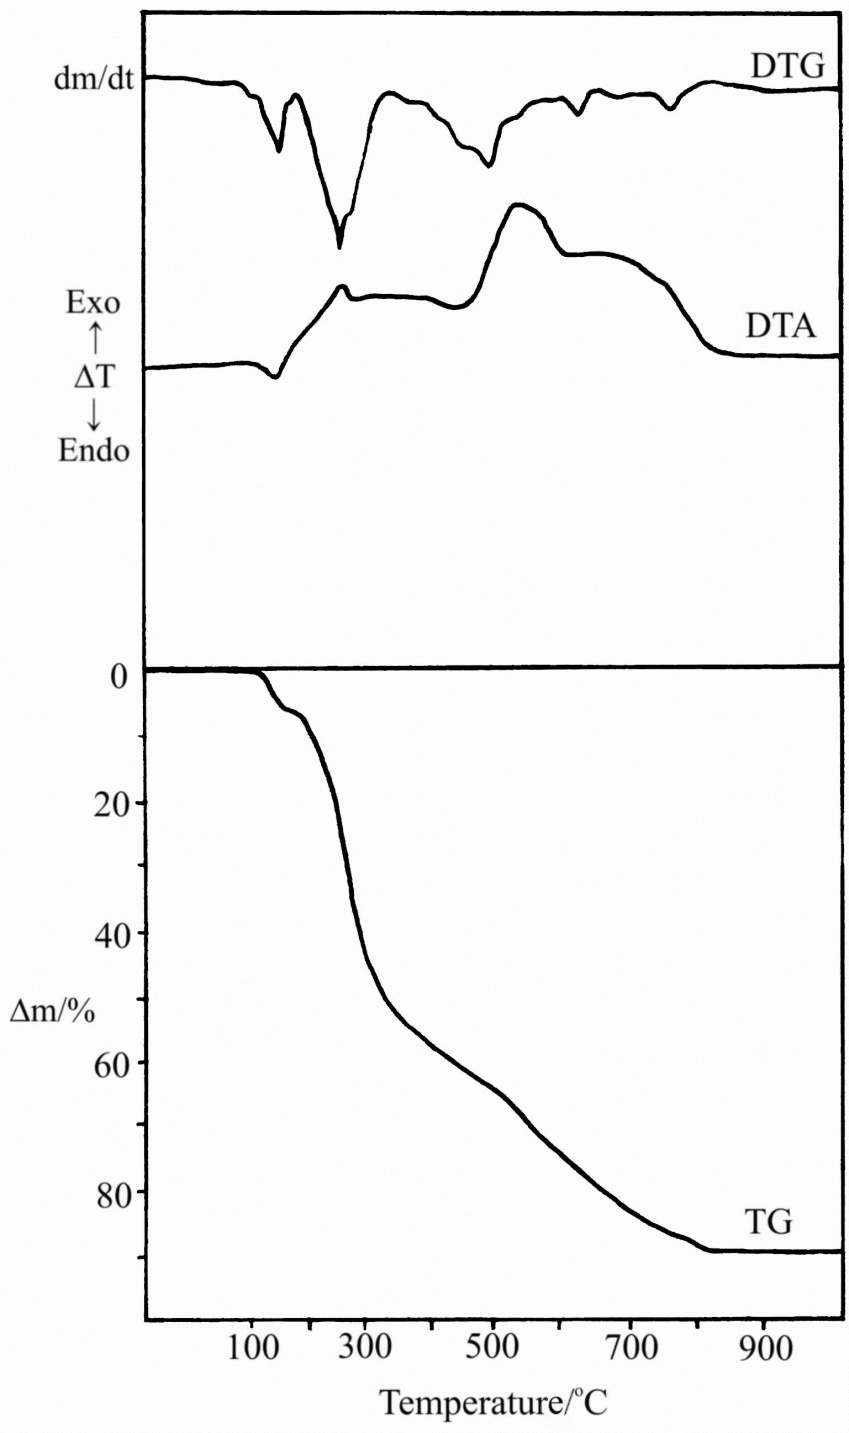


Figure 4A. TG/DTG/DTA curves of Cu(mef)2∙2H2O


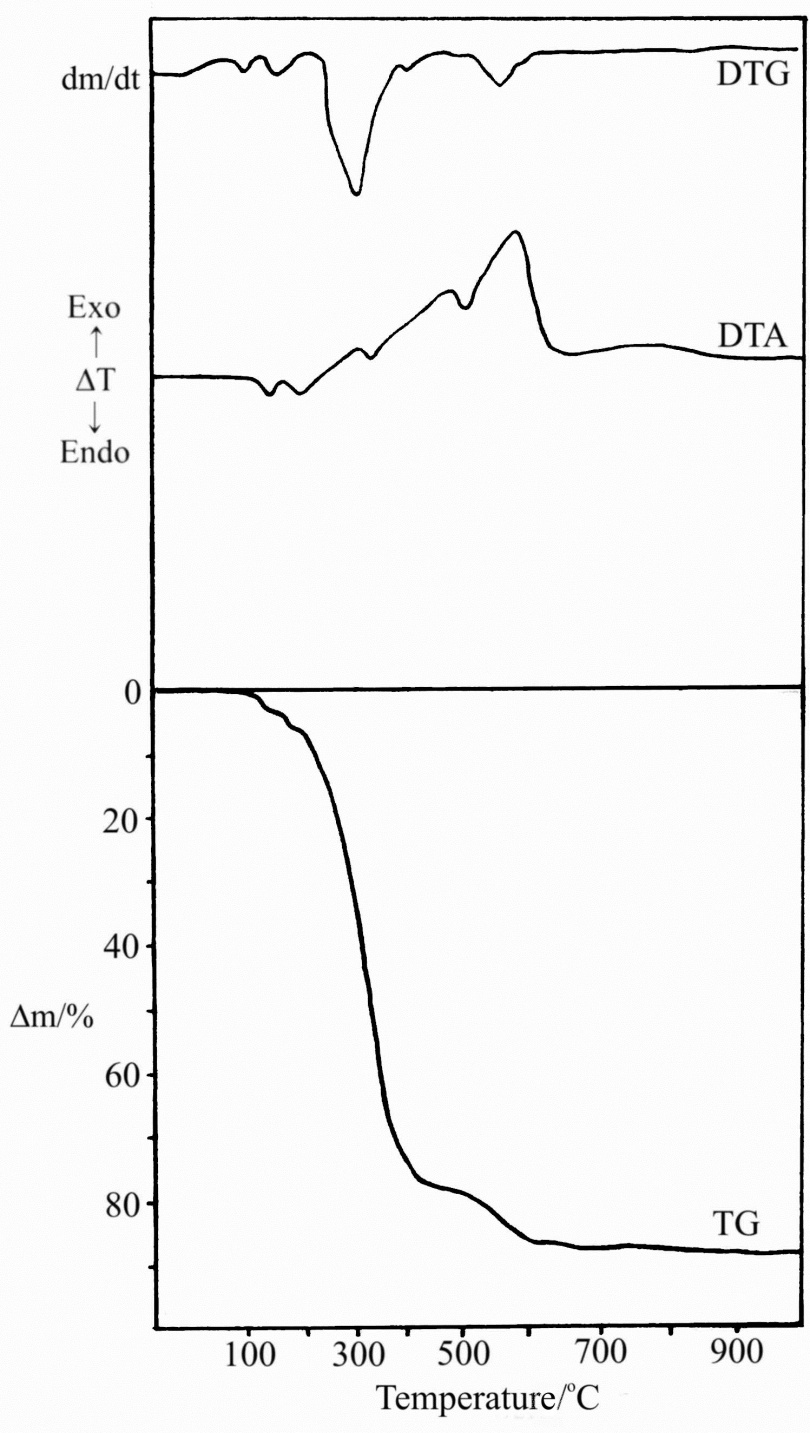


Figure 5A. TG/DTG/DTA curves of Zn(mef)2∙2H2O


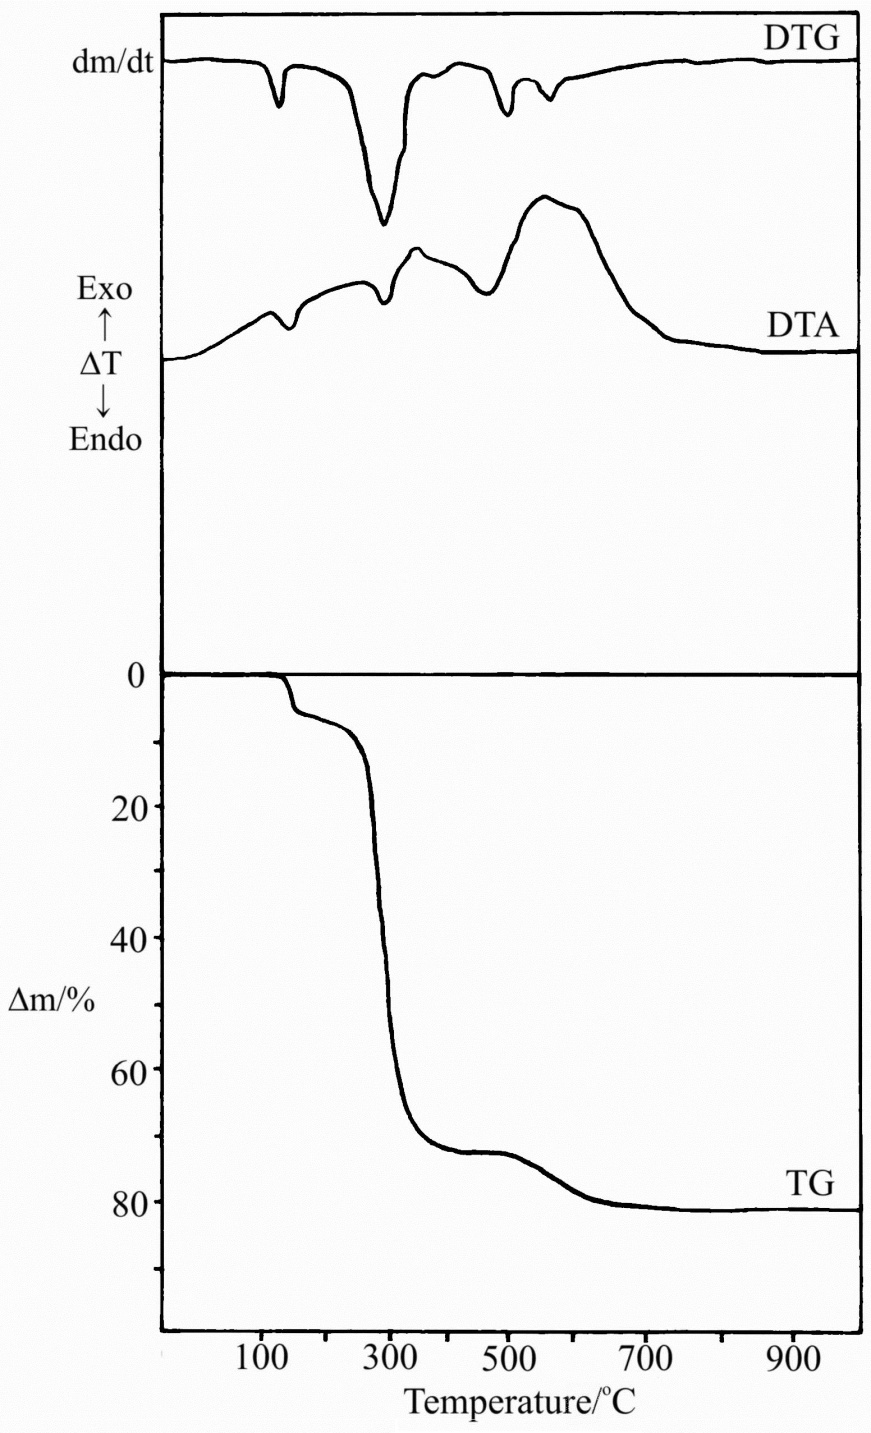


Figure 6A. TG/DTG/DTA curves of Cd(mef)2∙2H2O


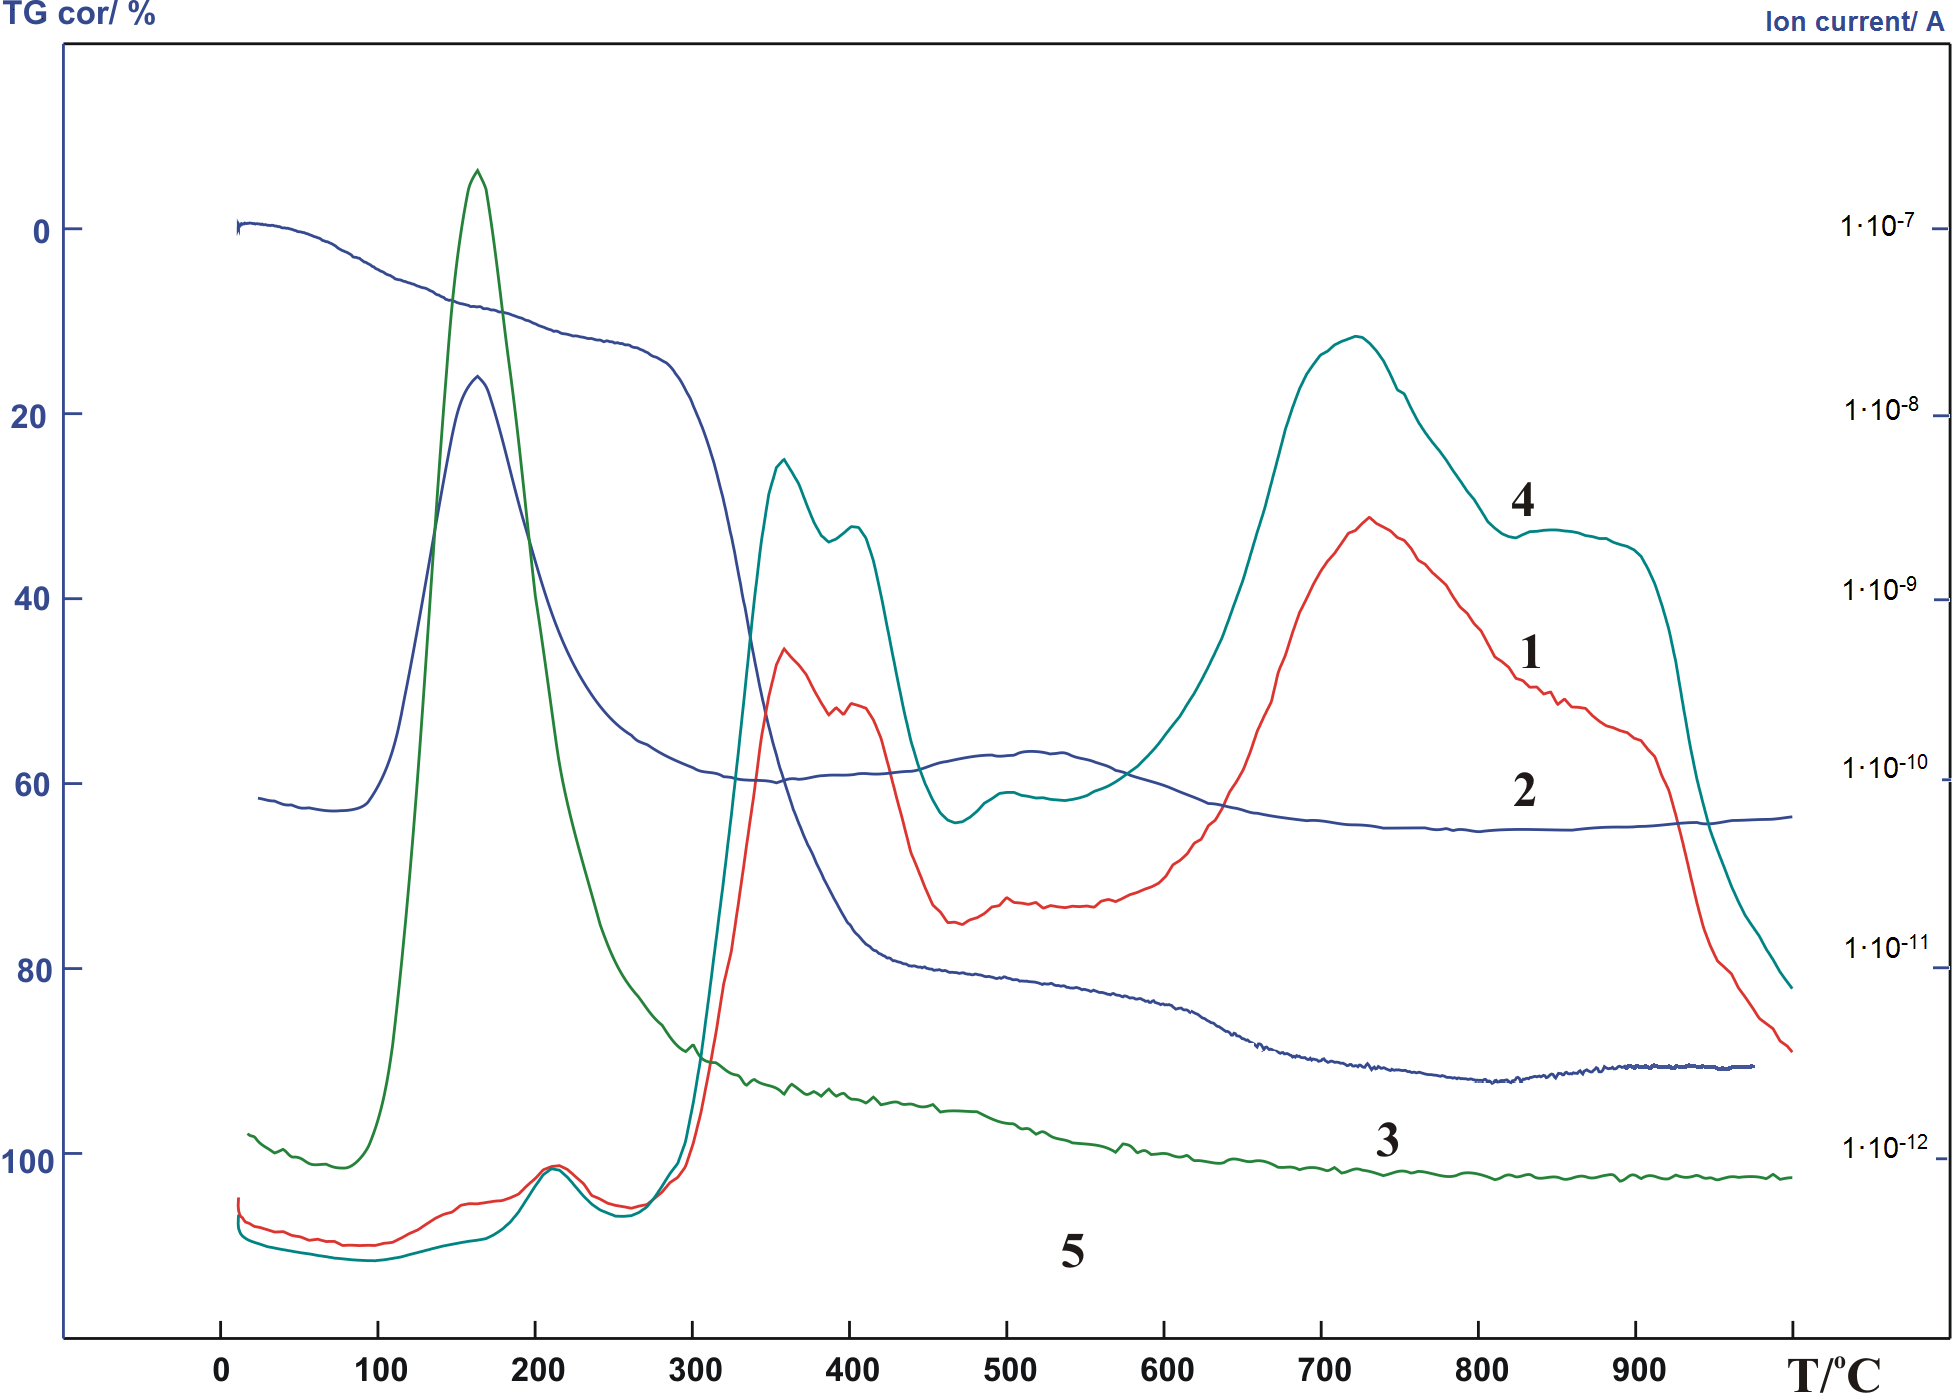


Figure 7A. TG and corresponding MS analysis of Mn(mef)2·3H2O (where: 1- m/z=12; 2- m/z= 15; 3- m/z= 18; 4- m/z= 44; 5- TG).


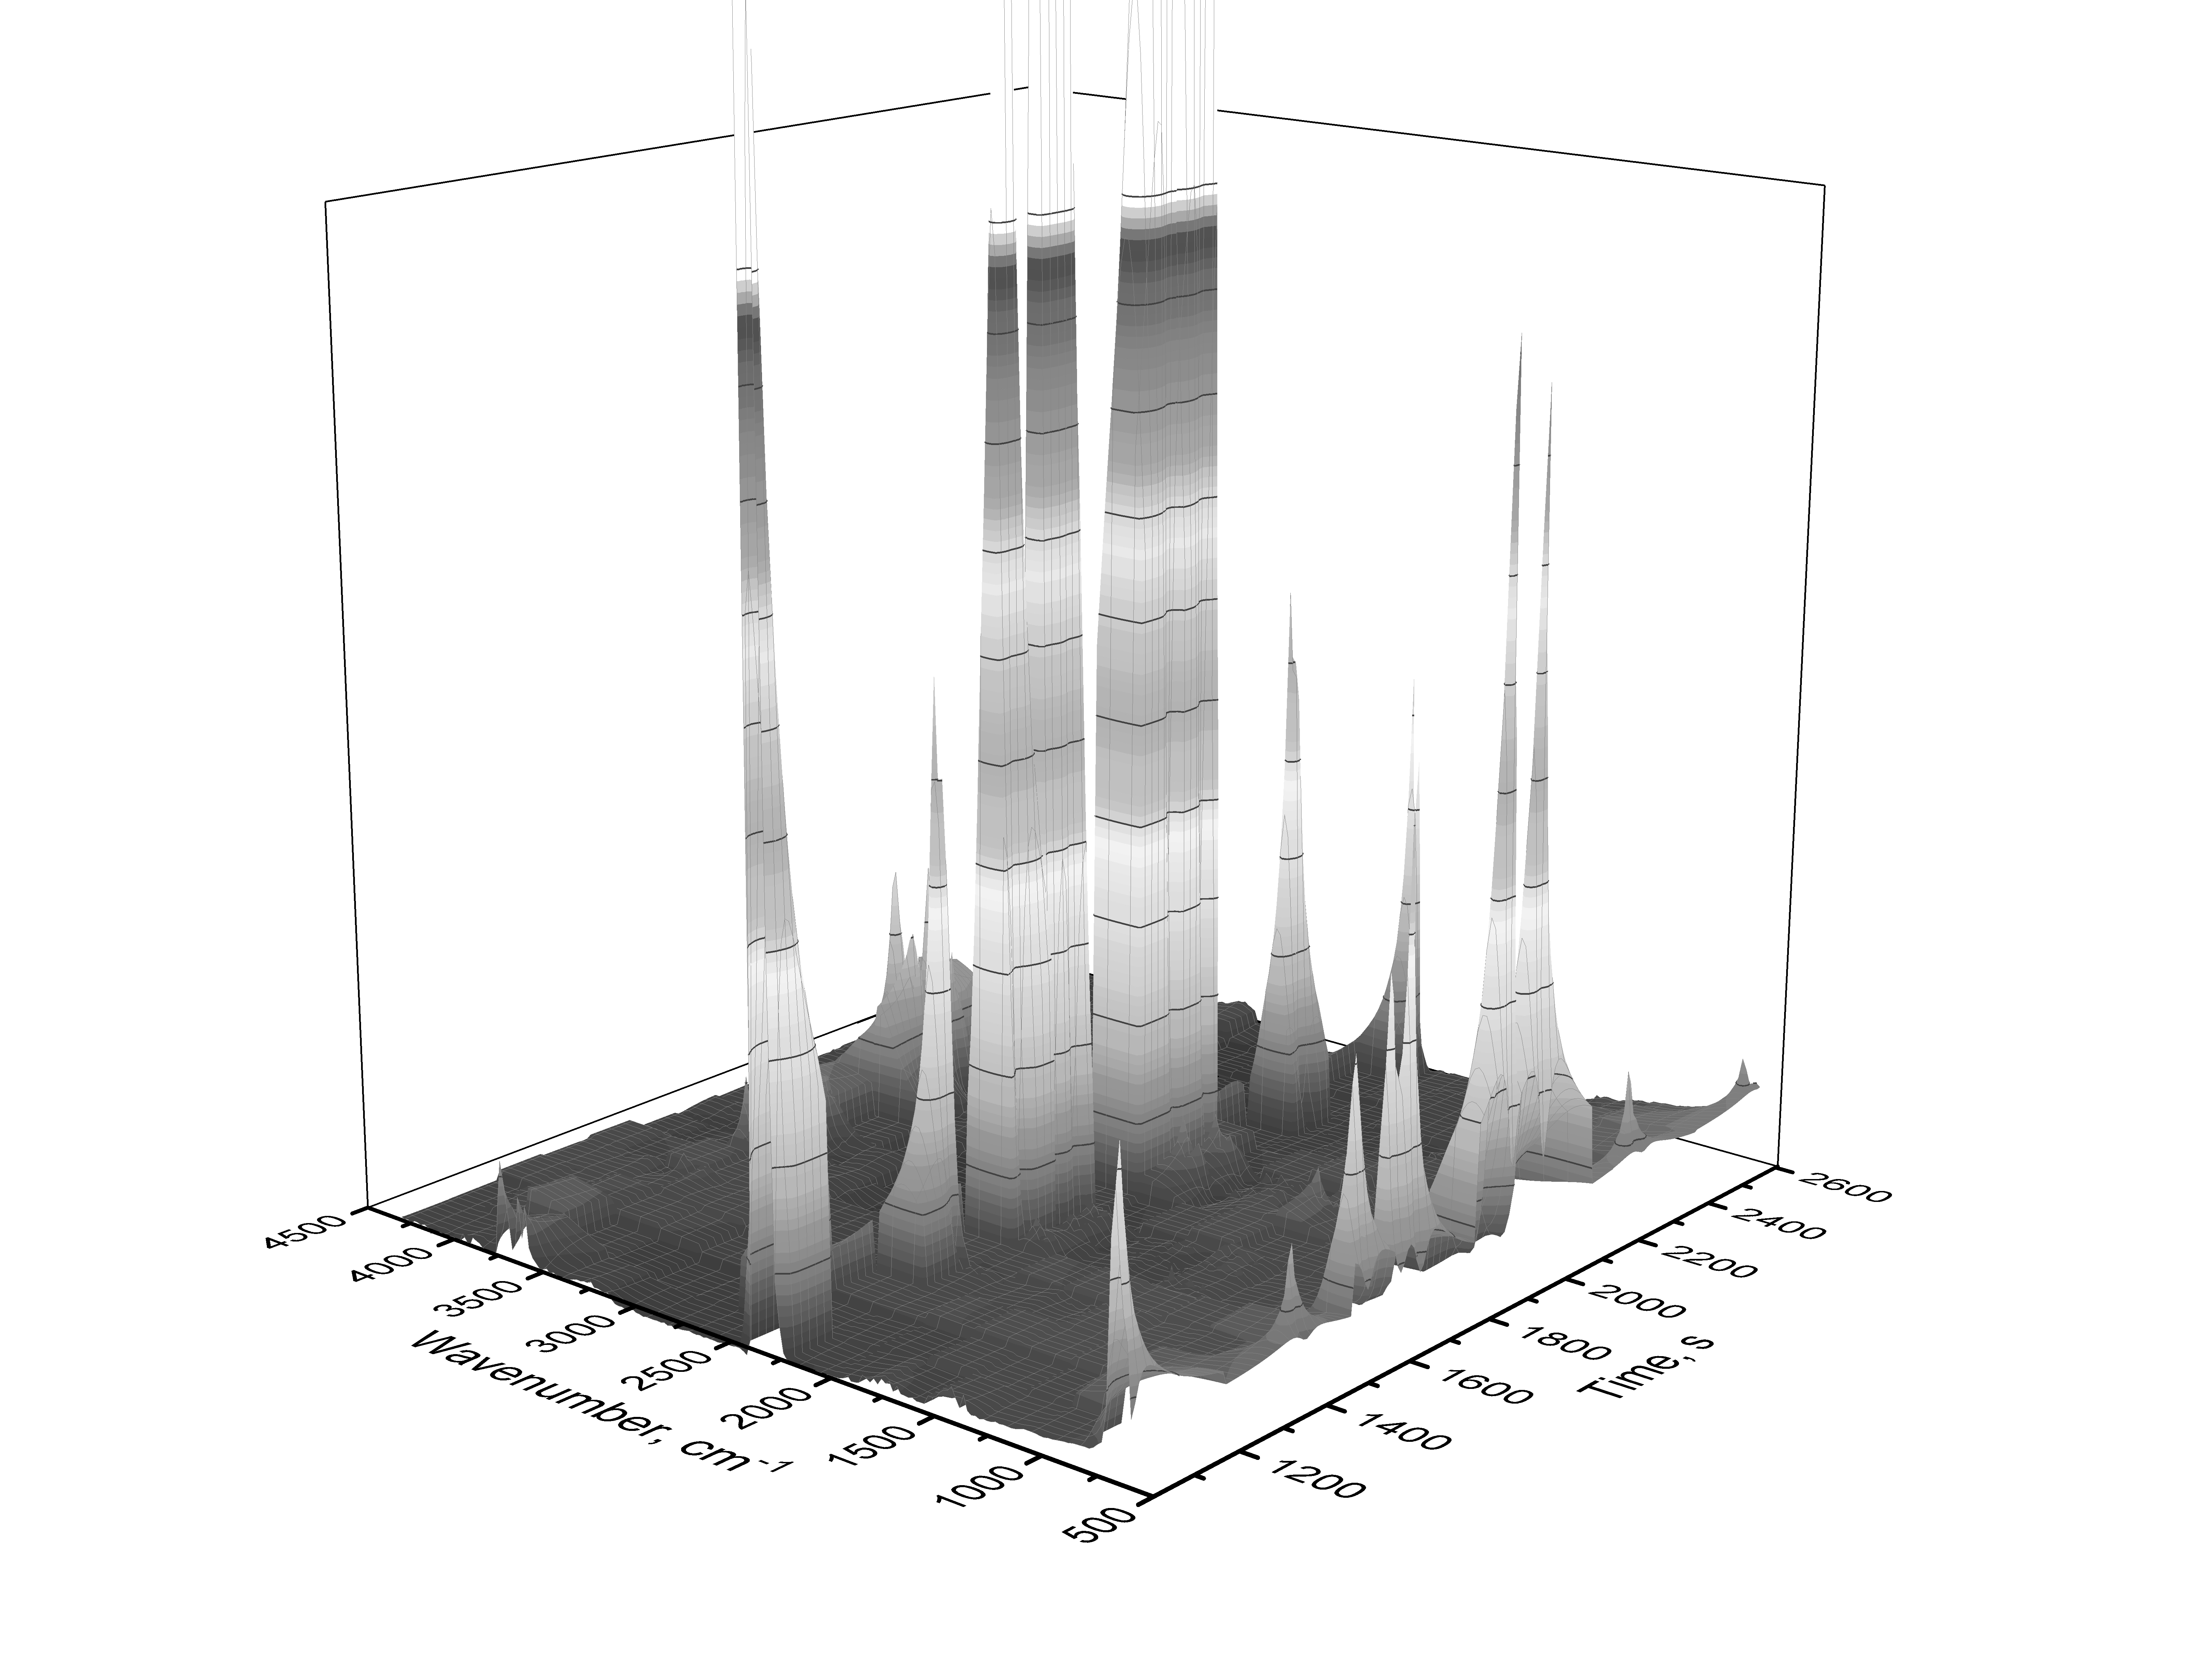


Figure 8A. The stacked plot TG-FTIR spectra of the evolved for Cu(mef)2·2H2O.


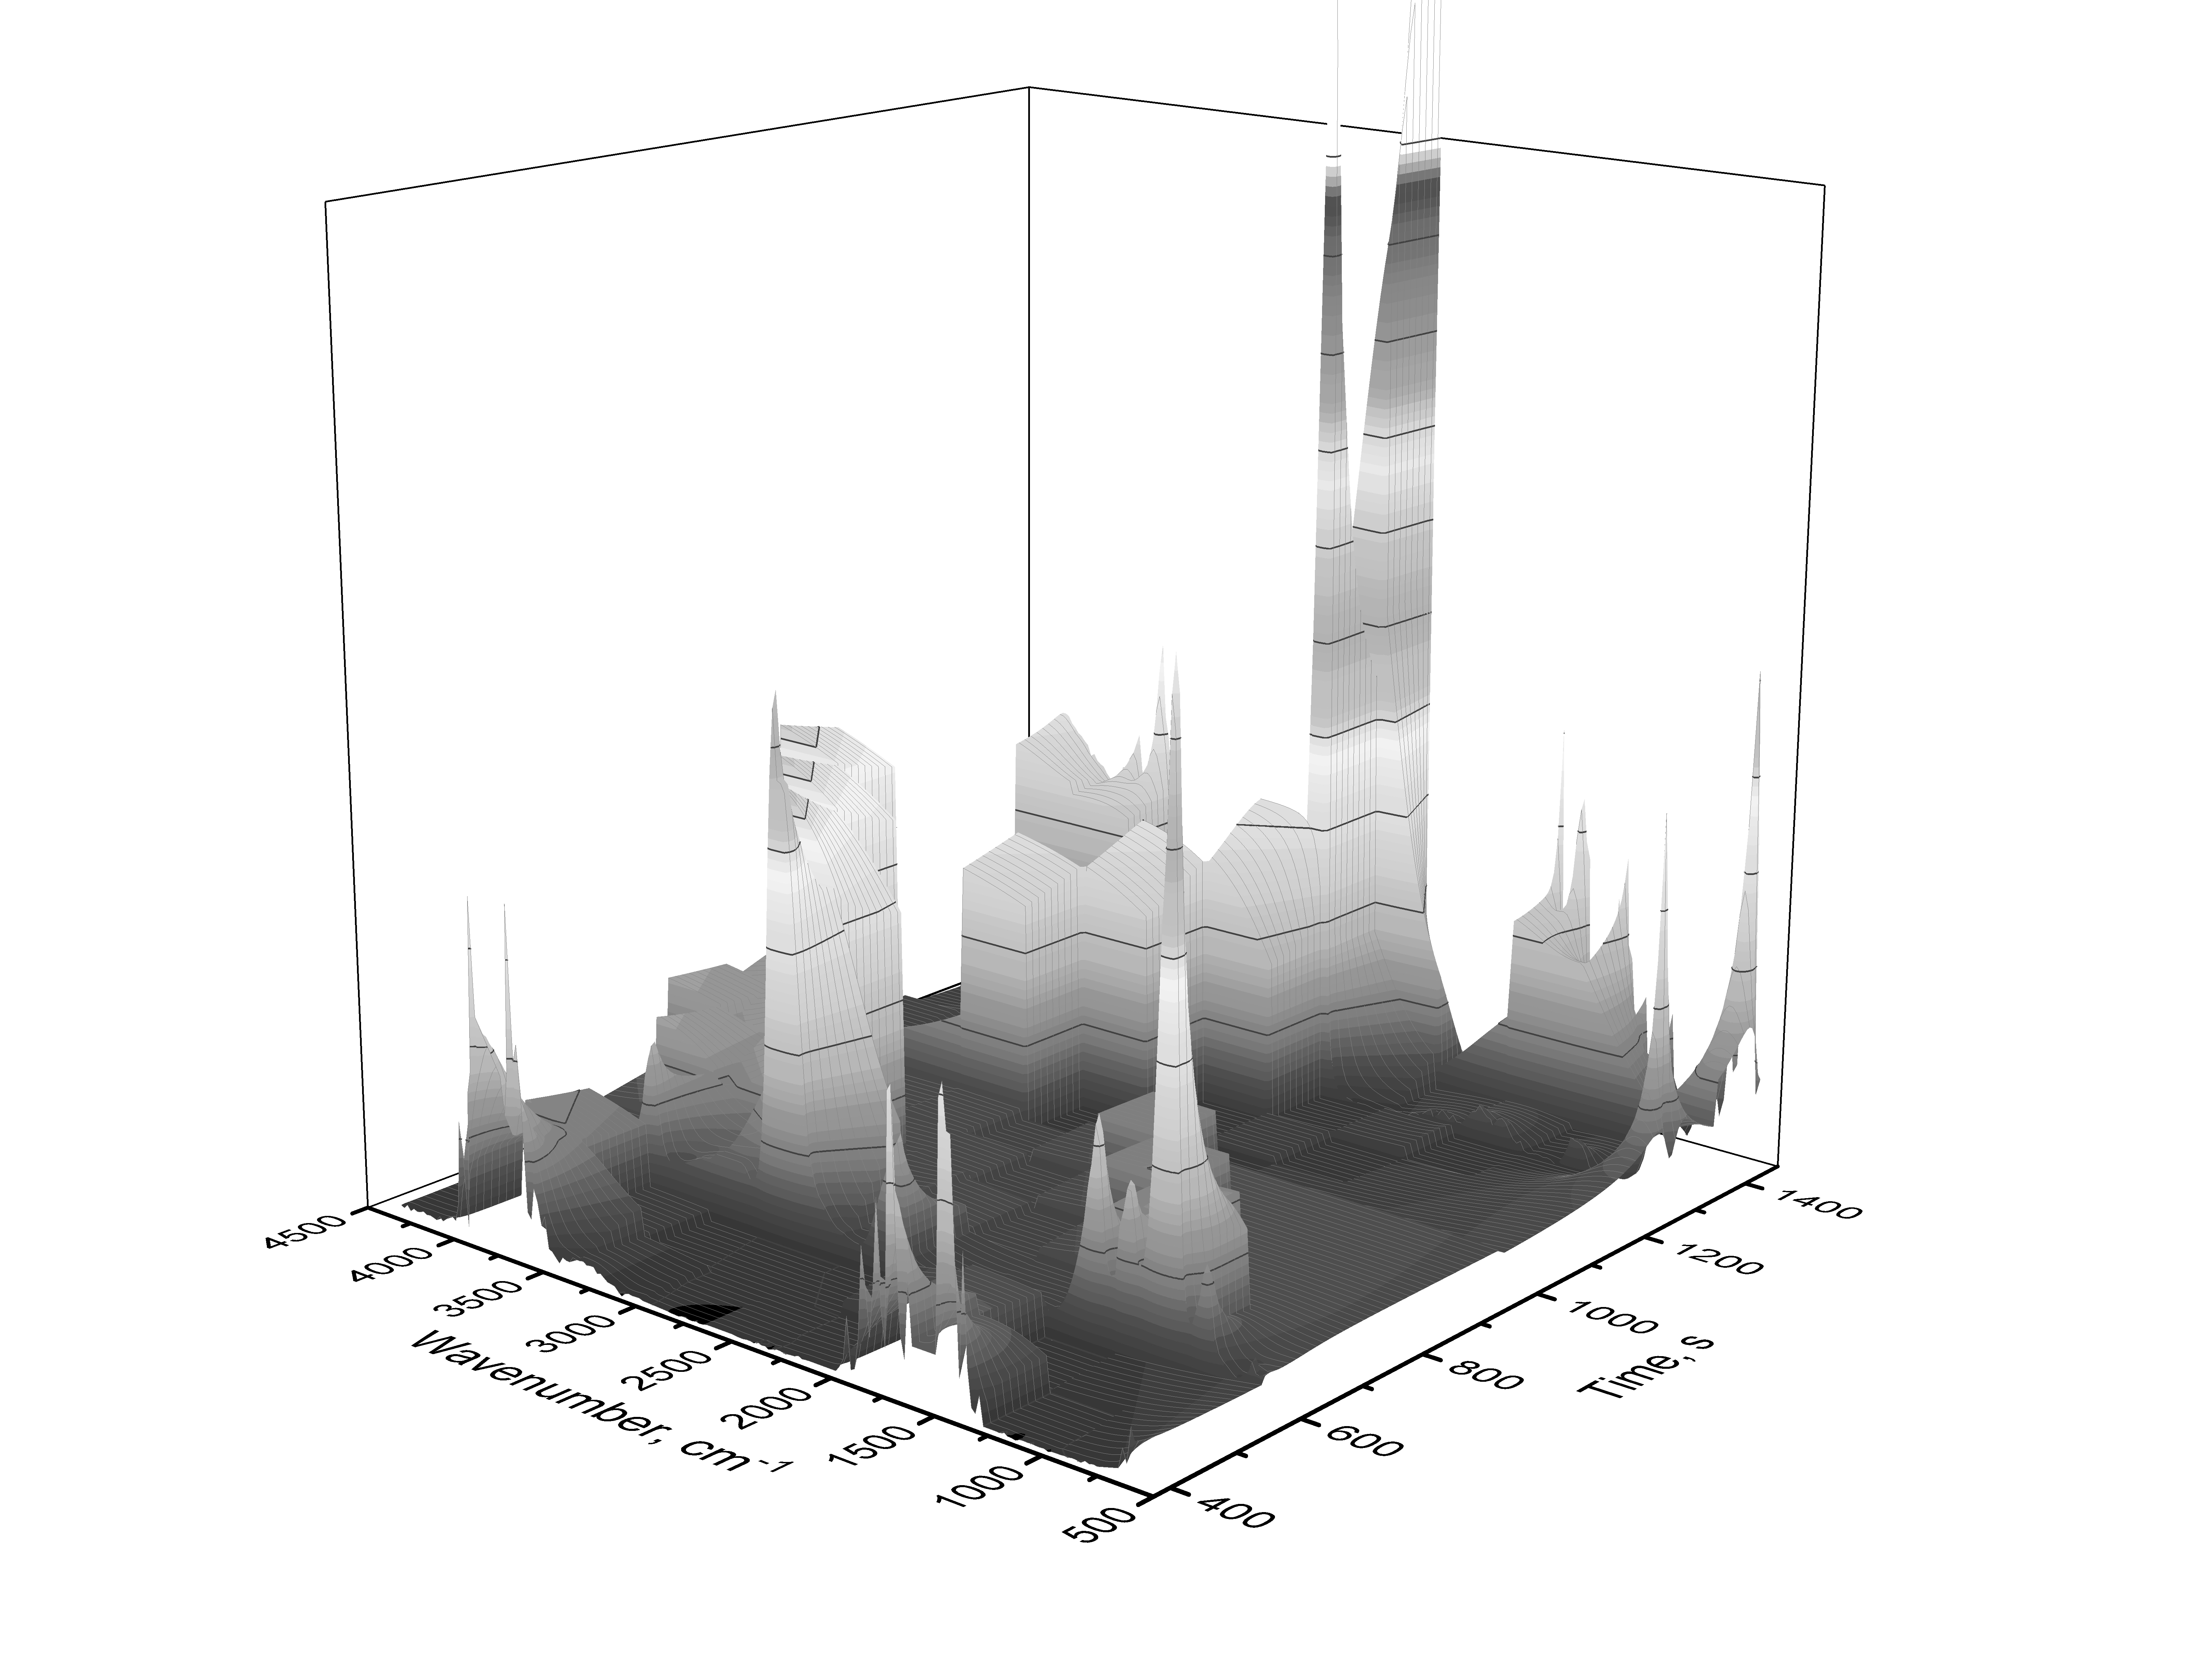


Figure 9A. The stacked plot TG-FTIR spectra of the evolved for Zn(mef)2·2H2O.
